# Supplementary material
Source: PubMed Central journal article supplement (PMC2738565)
Supplement: blood-2009-02-205278_1.pdf [file blood-2009-02-205278_1.pdf]

| <b>Immunotherapy Treatment</b> | <b>Day</b> | <b>Median GM-CSF* (pg/mL)</b> | <b>Range* (pg/mL)</b> |
|--------------------------------|------------|-------------------------------|-----------------------|
| Pre-transplant                 | 0          | 0                             | 0                     |
|                                | 1          | 9.1                           | 8.5 - 10.1            |
|                                | 2          | 4.1                           | 2.7 - 5.5             |
|                                | 3          | 2.6                           | NA                    |
|                                | 4          | 0                             | 0                     |
| Post-transplant #1             | 0          | 0                             | 0                     |
|                                | 1          | 54.2                          | NA                    |
|                                | 2          | 38.1                          | NA                    |
|                                | 3          | 15.5                          | NA                    |
|                                | 4          | 5.4                           | NA                    |
| Post-transplant #4             | 0          | 0                             | 0                     |
|                                | 1          | 7.4                           | 6.1 – 71.1            |
|                                | 2          | 27.2                          | 7.7 – 46.7            |
|                                | 3          | 13.9                          | NA                    |
|                                | 4          | 0                             | 0                     |
| Post-transplant #8             | 0          | 0                             | 0                     |
|                                | 1          | 55.8                          | NA                    |
|                                | 2          | 27.2                          | NA                    |
|                                | 3          | 14.0                          | NA                    |
|                                | 4          | 0                             | 0                     |

\* Median values summarize data only from patients with measurable levels  
NA = not available; only one subject with measurable levels
